# Supplementary material for: Impact of ocean warming and ocean acidification on asexual reproduction and statolith formation of the symbiotic jellyfish Cotylorhiza tuberculata
Source: PLOS journal article supplement (doi:10.1371/journal.pone.0254983), 2021-08-04
Supplement: S1 (10.1371/journal.pone.0254983.s001) [file journal.pone.0254983.s001]

# 1 S1 File

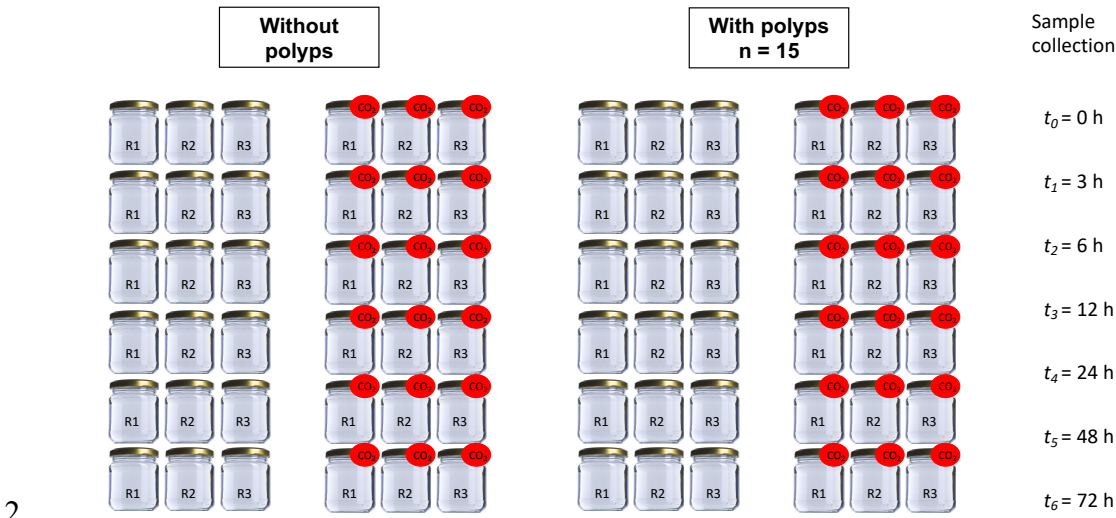

**S1 Fig. Pre-experiment design.** Seawater from 48 glass flasks with polyps and 48 glass flasks without polyps were used at each temperature treatment (18°C, 24°C and 30°C). Of these 48 glass flasks, 24 were bubbled with current ambient air and 24 bubbled with a gas mixture containing 1000 ppm of CO<sub>2</sub>. Sample collection for biogeochemical analysis of three replicate glass flask was done at the beginning of the pre-experiment ( $t_0$ ), and after 6 h ( $t_1$ ), 12 h ( $t_2$ ), 24 h ( $t_3$ ), 48 h ( $t_4$ ) and 72 h ( $t_5$ ) of the pre-experiment commencing.

**S1 Table. Pre-experiment mean physic-chemical parameters for each treatment.** Temperature (T), pH (pH<sub>T25</sub>), dissolved oxygen (DO), total alkalinity (A<sub>T</sub>) and P<sub>CO2</sub> in the six experimental treatments. Sample collection of three replicate glass flask was done at the beginning of the pre-experiment ( $t_0$ ), and after 6 h ( $t_1$ ), 12 h ( $t_2$ ), 24 h ( $t_3$ ), 48 h ( $t_4$ ) and 72 h ( $t_5$ ) of the pre-experiment commencing.

| Treatment        | Flasks   | Time     | T (°C)  | pH <sub>T25</sub> | DO (mg l <sup>-1</sup> ) | A <sub>T</sub> (μmol kg <sup>-1</sup> ) | pCO <sub>2</sub> (μatm) |
|------------------|----------|----------|---------|-------------------|--------------------------|-----------------------------------------|-------------------------|
| 18°C, ambient pH | Polyps   | $t_0$    | 18.1    | 7.92 (0.004)      | 7.42 (±0.12)             | 2491.81 (13.11)                         | 535.79 (41.77)          |
|                  |          | $t_{72}$ | (0.015) | 7.91 (0.002)      | 7.00 (±0.03)             |                                         |                         |
|                  | Seawater | $t_0$    |         | 7.92 (0.004)      | 7.42 (±0.12)             |                                         |                         |

|                  |          |                 |                 |              |              |                 |                |
|------------------|----------|-----------------|-----------------|--------------|--------------|-----------------|----------------|
|                  |          | t <sub>72</sub> |                 | 7.87 (0.003) | 6.94 (±0.21) |                 |                |
| 18°C, future pH  | Polyps   | t <sub>0</sub>  |                 | 7.71 (0.004) | 7.59 (±0.13) | 2498.9 (11.49)  | 1084 (91.51)   |
|                  |          | t <sub>72</sub> |                 | 7.62 (0.01)  | 6.72 (±0.06) |                 |                |
|                  | Seawater | t <sub>0</sub>  |                 | 7.71 (0.004) | 7.59 (±0.13) |                 |                |
|                  |          | t <sub>72</sub> |                 | 7.63 (0.01)  | 7.02 (±0.14) |                 |                |
| 24°C, ambient pH | Polyps   | t <sub>0</sub>  | 24.3<br>(0.026) | 7.99 (0.002) | 7.01 (0.12)  | 2516.81 (13.89) | 495.63 (22.20) |
|                  |          | t <sub>72</sub> |                 | 7.88 (0.004) | 6.83 (0.07)  |                 |                |
|                  | Seawater | t <sub>0</sub>  |                 | 7.99 (0.002) | 7.01 (0.12)  |                 |                |
|                  |          | t <sub>72</sub> |                 | 7.91 (0.009) | 6.79 (0.10)  |                 |                |
| 24°C, future pH  | Polyps   | t <sub>0</sub>  |                 | 7.71 (0.001) | 7.13 (0.11)  | 2507.9 (20.49)  | 1021 (41.82)   |
|                  |          | t <sub>72</sub> |                 | 7.68 (0.008) | 6.97 (0.17)  |                 |                |
|                  | Seawater | t <sub>0</sub>  |                 | 7.71 (0.001) | 7.13 (0.11)  |                 |                |
|                  |          | t <sub>72</sub> |                 | 7.69 (0.011) | 6.88 (0.21)  |                 |                |
| 30°C, ambient pH | Polyps   | t <sub>0</sub>  | 30.2<br>(0.017) | 8.03 (0.005) | 6.34 (0.08)  | 2509.21 (16.07) | 499.12 (15.20) |
|                  |          | t <sub>72</sub> |                 | 7.92 (0.018) | 6.20 (0.28)  |                 |                |
|                  | Seawater | t <sub>0</sub>  |                 | 8.03 (0.005) | 6.34 (0.08)  |                 |                |
|                  |          | t <sub>72</sub> |                 | 7.94 (0.031) | 6.17 (0.23)  |                 |                |
| 30°C, future pH  | Polyps   | t <sub>0</sub>  |                 | 7.86 (0.001) | 6.28 (0.09)  | 2507.9 (20.49)  | 1003 (77.82)   |
|                  |          | t <sub>72</sub> |                 | 7.79 (0.009) | 5.93 (0.11)  |                 |                |
|                  | Seawater | t <sub>0</sub>  |                 | 7.86 (0.001) | 6.28 (0.09)  |                 |                |
|                  |          | t <sub>72</sub> |                 | 7.79 (0.009) | 5.91 (0.11)  |                 |                |

Mean (SEM) *n* = 4 per day and treatment.

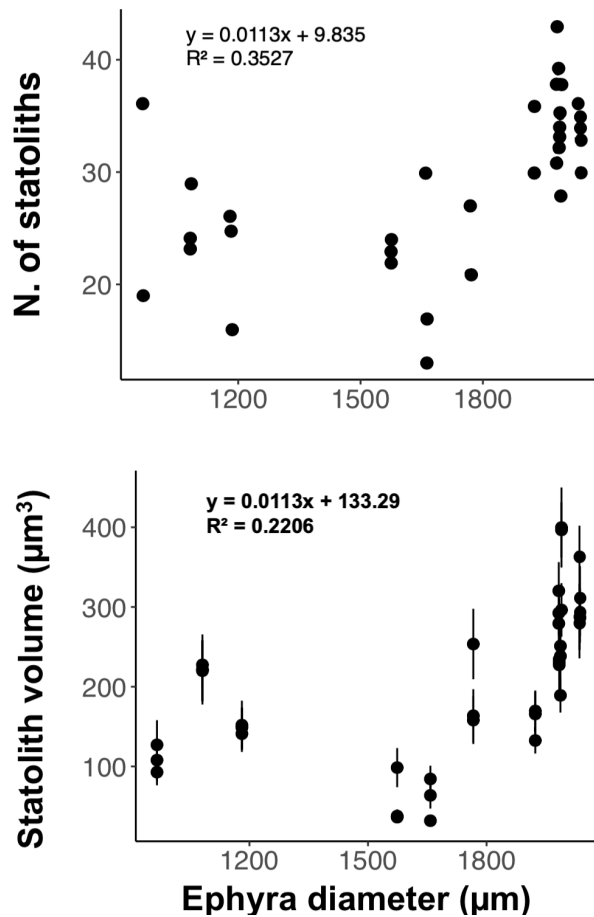

**S2 Fig. Relationship between ephyrae diameter ( $n = 13$ ) and number or size of statoliths.** Ephyrae diameters represented correspond to well-formed individuals used for statolith analyses that were released at the end of experiment 2.

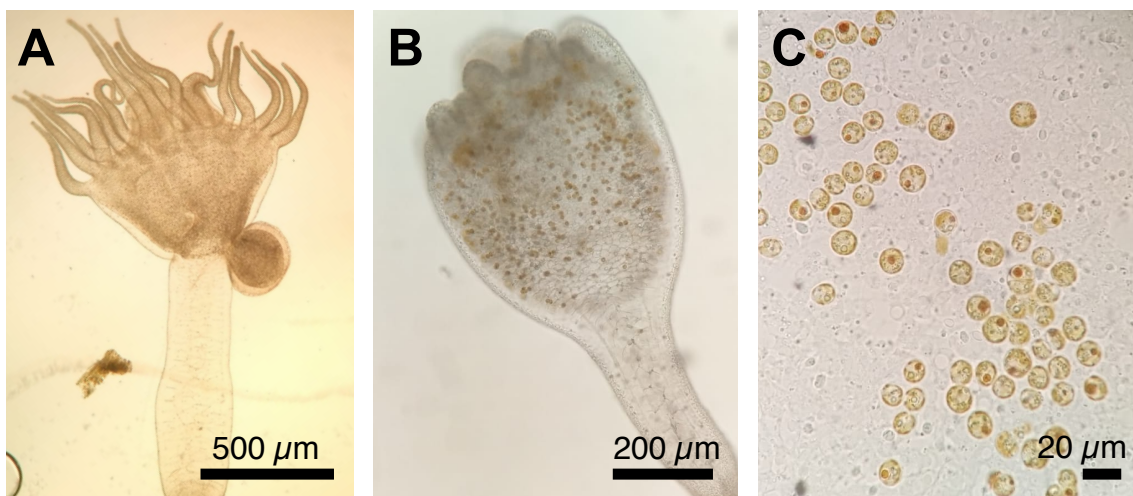

**S3 Fig. Zooxanthellae within the polyps of *Cotylorhiza tuberculata* at the end of Experiment 2.** A: Mature polyp reproducing asexually by budding, note shaded areas

33 in the calix and bud evidencing zooxanthellae presence. B: Newly formed polyp with  
34 zooxanthellae within the calix. C: Zooxanthellae of the family Symbiodiniceae within  
35 the gastrovascular system of a new released ephyrae.  
36
